# Supplementary material for: Protection against symptomatic SARS-CoV-2 BA.5 infection conferred by the Pfizer-BioNTech Original/BA.4-5 bivalent vaccine compared to the mRNA Original (ancestral) monovalent vaccines – a matched cohort study in France
Source: bioRxiv or medRxiv preprint supplement (doi:10.1101/2023.03.17.23287411), 2023-03-28
Supplement: Supplementary file [file media-1.pdf]

Protection against symptomatic SARS-CoV-2 BA.5 infection conferred by the Pfizer-BioNTech Original/BA.4-5 bivalent vaccine compared to the mRNA Original (ancestral) monovalent vaccines – a matched cohort study in France

## Appendix

### Contents

|                                           |   |
|-------------------------------------------|---|
| Selection of individuals.....             | 1 |
| Epidemiological background .....          | 2 |
| Descriptive and univariate analysis ..... | 3 |
| Univariate analysis .....                 | 4 |
| Multivariate analysis.....                | 5 |

### Selection of individuals

*Table S1 : Inclusion process (before matching)*

|                                                                            | Excluded | Remain         |
|----------------------------------------------------------------------------|----------|----------------|
| Born in 1962 and earlier and boosted during the inclusion period           |          | 878,492        |
| Exclusion for data inconsistency                                           | 10,354   | 868,138        |
| very-high-risk comorbidity <sup>1</sup>                                    | 91,686   | 773,623        |
| primary vaccine series with less or more than two doses                    | 47,565   | 728,887        |
| at least one supplementary dose for medical reason (ex: immunosuppression) | 24,889   | 703,998        |
| pre-inclusion booster with non mRNA vaccine                                | 113      | 703,885        |
| positive test < 60 days before follow-up                                   | 1,861    | 702,024        |
| >20 tests in the 6 months prior to inclusion                               | 26       | 701,998        |
| over 99 years                                                              | 1,940    | <b>700,058</b> |

<sup>1</sup>: cancers, haematological malignancies undergoing chemotherapy, severe chronic kidney disease, chronic dialysis, solid organ transplants, haematopoietic stem cell allografts, chronic multi-disease conditions with two or more organ failures, certain rare diseases and those at particular risk of infection, and Down's syndrome

*Table S2 : Size of the study population after matching*

|                 | Total   | matched | % matched |
|-----------------|---------|---------|-----------|
| Original/BA.4-5 | 582,398 | 68,426  | 12%       |
| Original        | 117,660 | 68,426  | 58%       |
| Total           | 697,649 | 136,852 | 20%       |

## Epidemiological background

Figure S1: Weekly community incidence rates (France, data SI-DEP)

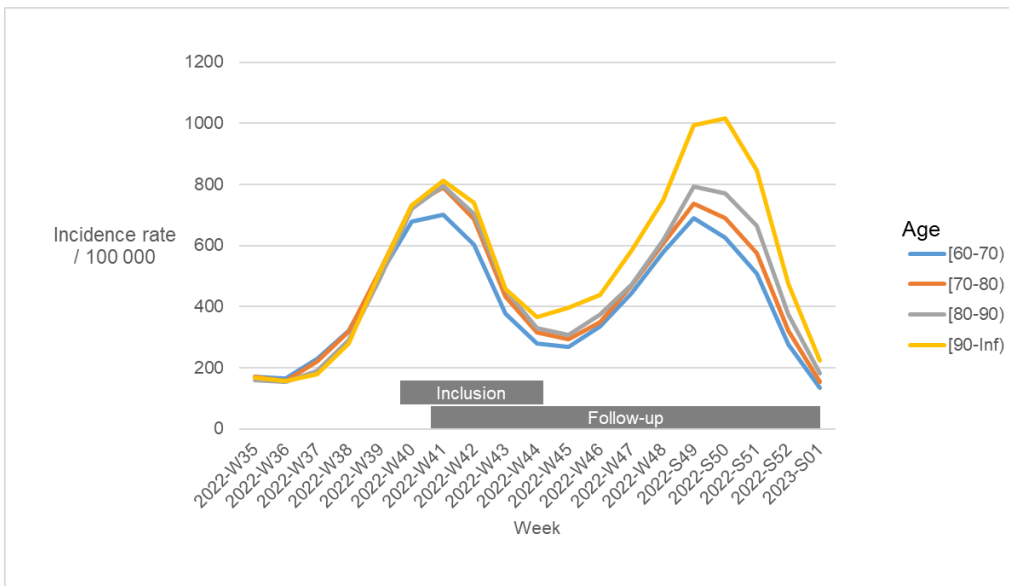

Figure S2: Emergence of B.Q.1.1\* in France according to representative whole genome sequencing

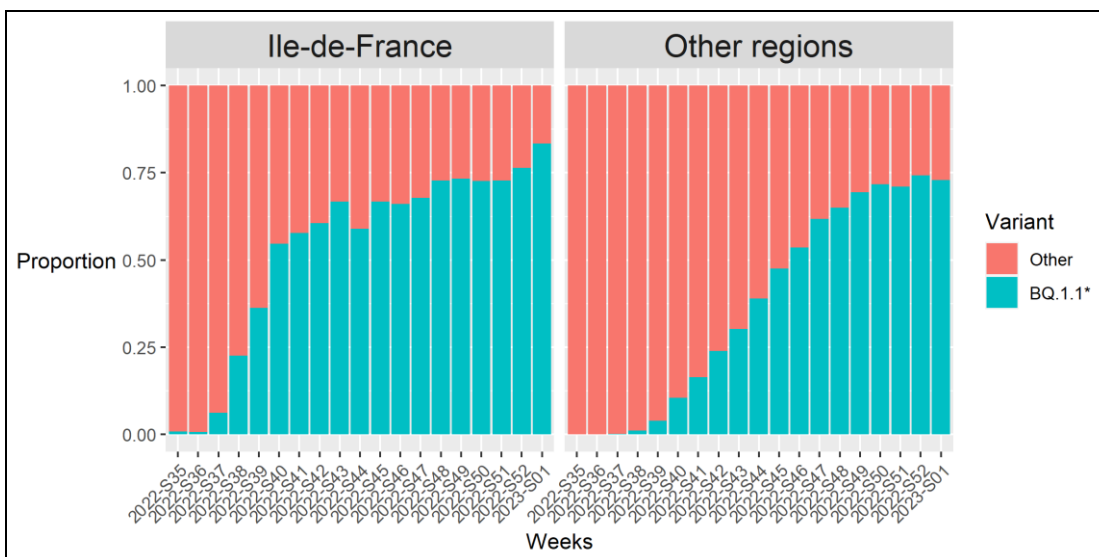

## Descriptive and univariate analysis

Figure S3 : Immunisation history by rank of booster at inclusion (one colour per dose: salmon: dose 1, pink: dose 2, blue: dose 3, light blue: dose 4, green: dose 5)

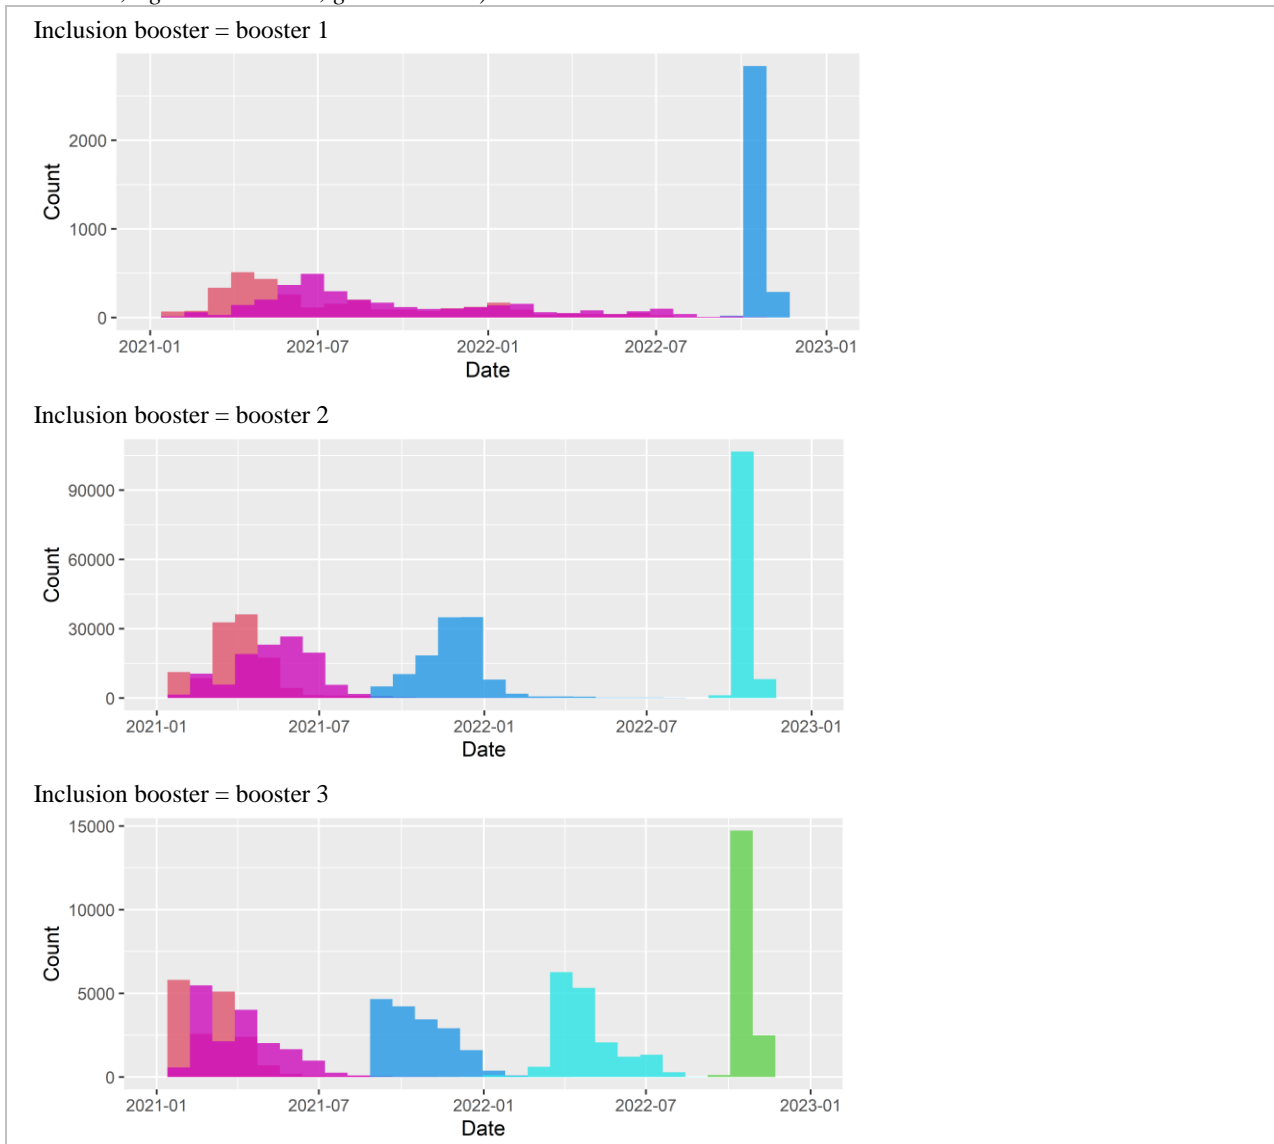

## Univariate analysis

Tableau S3 : Descriptive statistics by occurrence of the outcome

|                           | Outcome                      |                             | p-value <sup>2</sup> |
|---------------------------|------------------------------|-----------------------------|----------------------|
|                           | No, N = 134,680 <sup>1</sup> | Yes, N = 2,172 <sup>1</sup> |                      |
| Week of inclusion         |                              |                             | <0.001               |
| 2022-W40                  | 20,097 (98%)                 | 391 (2%)                    |                      |
| 2022-W41                  | 51,672 (98%)                 | 898 (2%)                    |                      |
| 2022-W42                  | 33,367 (99%)                 | 507 (1%)                    |                      |
| 2022-W43                  | 19,921 (99%)                 | 253 (1%)                    |                      |
| 2022-W44                  | 9,623 (99%)                  | 123 (1%)                    |                      |
| Inclusion booster         |                              |                             | 0.008                |
| Original                  | 67,279 (98%)                 | 1,147 (2%)                  |                      |
| Original / BA.4-5         | 67,401 (99%)                 | 1,025 (1%)                  |                      |
| Booster dose at inclusion |                              |                             | <0.001               |
| 1                         | 3,126 (99%)                  | 46 (1%)                     |                      |
| 2                         | 114,593 (98%)                | 1,767 (2%)                  |                      |
| 3                         | 16,961 (98%)                 | 359 (2%)                    |                      |
| Sex                       |                              |                             | <0.001               |
| Female                    | 73,552 (99%)                 | 1,092 (1%)                  |                      |
| Male                      | 61,128 (98%)                 | 1,080 (2%)                  |                      |
| Age                       |                              |                             | 0.89                 |
| 60-79                     | 99,319 (98%)                 | 1,599 (2%)                  |                      |
| 80-99                     | 35,361 (98%)                 | 573 (2%)                    |                      |
| Previous infection        |                              |                             | <0.001               |
| Undocumented              | 92,126 (98%)                 | 1,791 (2%)                  |                      |
| Delta/Pre-Delta           | 2,678 (98%)                  | 61 (2%)                     |                      |
| Tr_Delta-BA.1             | 1,708 (98%)                  | 28 (2%)                     |                      |
| Omicron BA.1              | 11,925 (99%)                 | 158 (1%)                    |                      |
| Omicron BA.2 BA.4/5       | 26,243 (99%)                 | 134 (1%)                    |                      |
| Medium-risk comorbidity   |                              |                             | 0.003                |
| No                        | 86,249 (98%)                 | 1,323 (2%)                  |                      |
| Yes                       | 48,431 (98%)                 | 849 (2%)                    |                      |

<sup>1</sup>n (%)

<sup>2</sup>Pearson's Chi-squared test; Fisher's exact test

Figure S4 : Cumulative probability over time of symptomatic infection since the booster dose by the type of vaccine of the booster dose - Follow-up started 7 days after booster injection; ribbons indicate 95%CI

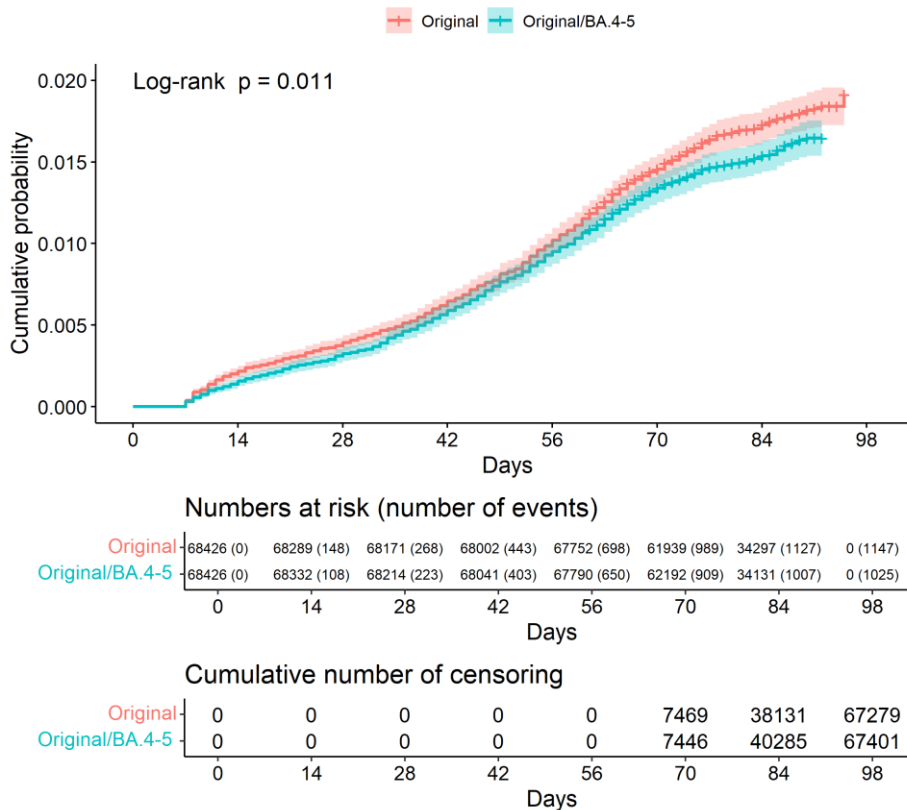

Figure S5 : Cumulative probability over time of symptomatic infection since the booster dose by previous infection - Follow-up started 7 days after booster injection; ribbons indicate 95%CI

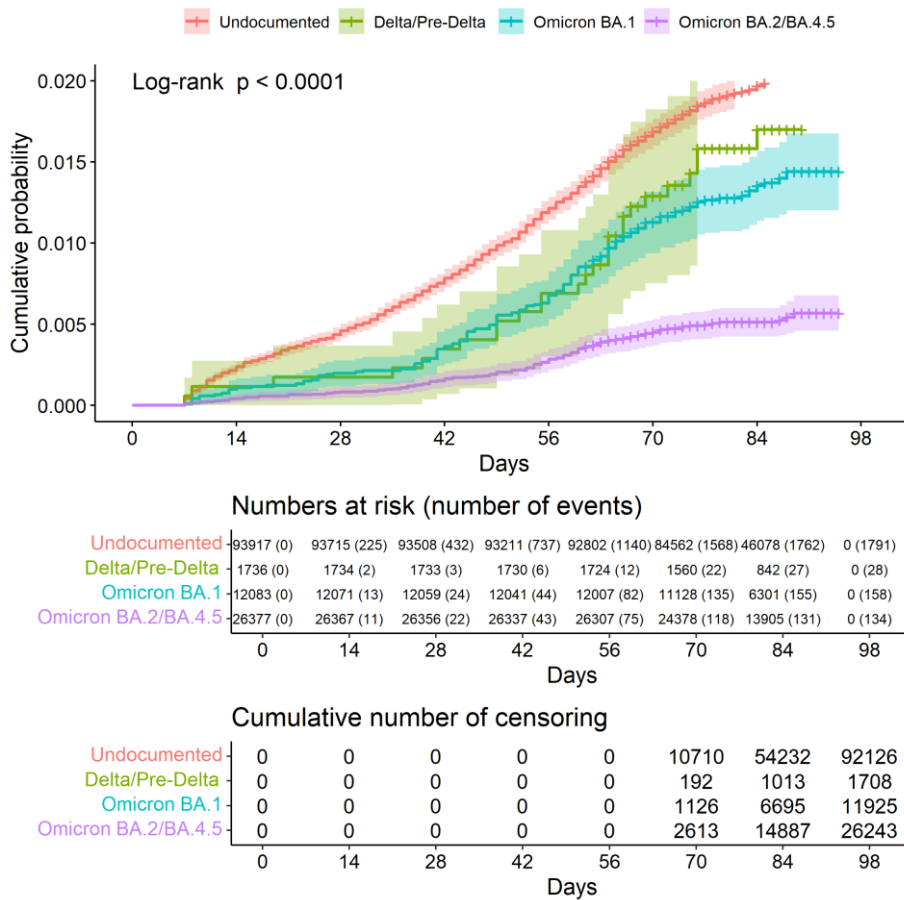

## Multivariate analysis

Table S4 : Multivariate analysis (Cox Proportional-Hazards Model - N=136,852, number of events= 2172)

|                                | aHR <sup>1</sup> | 95% CI <sup>1</sup> | p-value |
|--------------------------------|------------------|---------------------|---------|
| <b>Inclusion booster</b>       |                  |                     |         |
| Original                       | —                | —                   |         |
| Original / BA.4-5              | 0.92             | 0.84, 1.00          | 0.045   |
| <b>Age</b>                     |                  |                     |         |
| 60-79                          | —                | —                   |         |
| 80-99                          | 0.98             | 0.89, 1.08          | 0.6     |
| <b>Sex</b>                     |                  |                     |         |
| Female                         | —                | —                   |         |
| Male                           | 1.19             | 1.09, 1.29          | <0.001  |
| <b>Medium-risk comorbidity</b> |                  |                     |         |
| No                             | —                | —                   |         |
| Yes                            | 1.12             | 1.03, 1.23          | 0.008   |
| <b>Previous infection</b>      |                  |                     |         |
| Undocumented                   | —                | —                   |         |
| Delta/Pre-Delta                | 1.15             | 0.89, 1.48          | 0.3     |
| Tr_Delta-BA.1                  | 0.84             | 0.58, 1.21          | 0.3     |
| Omicron BA.1                   | 0.67             | 0.57, 0.79          | <0.001  |
| Omicron BA.2 BA.4/5            | 0.26             | 0.22, 0.31          | <0.001  |

<sup>1</sup>aHR = adjusted hazard ratio, CI = Confidence Interval

Table S5 : Multivariate analysis – Participants without previous infection (Cox Proportional-Hazards Model - N=93,917, number of events= 1791)

|                         | aHR <sup>1</sup> | 95% CI <sup>1</sup> | p-value |
|-------------------------|------------------|---------------------|---------|
| Inclusion booster       |                  |                     |         |
| Original                | —                | —                   |         |
| Original / BA.4-5       | 0.96             | 0.88, 1.06          | 0.4     |
| Age                     |                  |                     |         |
| 60-79                   | —                | —                   |         |
| 80-99                   | 0.90             | 0.81, 1.01          | 0.070   |
| Sex                     |                  |                     |         |
| Female                  | —                | —                   |         |
| Male                    | 1.21             | 1.10, 1.33          | <0.001  |
| Medium-risk comorbidity |                  |                     |         |
| No                      | —                | —                   |         |
| Yes                     | 1.12             | 1.02, 1.24          | 0.017   |

<sup>1</sup>aHR = Hazard Ratio, CI = Confidence Interval
